# Supplementary material
Source: publisher figshare collection journal article supplement (https://acs.figshare.com/ndownloader/files/20549238)
Supplement: Supplementary file 1 [file 20549238]

# Supporting Information

## Investigation of the Oxidation Behavior of Graphene/Ge (001) Vs. Graphene/Ge (110) Systems

Fatima Akhtar<sup>\*†</sup>, Jaroslaw Dabrowski<sup>†</sup>, Marco Lisker<sup>†</sup>, Yuji Yamamoto<sup>†</sup>, Andreas Mai<sup>†,‡</sup>,  
Christian Wenger<sup>†,§</sup>, and Mindaugas Lukosius<sup>†</sup>

<sup>†</sup>IHP – Leibniz-Institut für innovative Mikroelektronik, Im Technologiepark 25, 15236  
Frankfurt (Oder), Germany

<sup>‡</sup>Technical University of Applied Sciences Wildau, Hochschulring 1, 15745 Wildau, Germany

<sup>§</sup>Brandenburg Medical School Theodor Fontane, 16816 Neuruppin, Germany

\*Corresponding author: [akhtar@ihp-microelectronics.com](mailto:akhtar@ihp-microelectronics.com)

As mentioned in the text, the oxidation of graphene-covered Ge(001) and Ge(110) substrates were monitored for more than seven months. Figures S1a and S1b depict C1s photoelectron spectra of graphene/Ge(001) and Ge(110) samples immediately after the growth and after multiple weeks in ambient conditions, respectively.

O1s spectra of as-deposited and air-exposed graphene/Ge(001) and Ge(110) systems are displayed in Figure S2. Figure S3 shows the Ge2p photoelectron spectra of as-deposited and air-exposed graphene/Ge(001) and Ge(110) samples.

# C1s

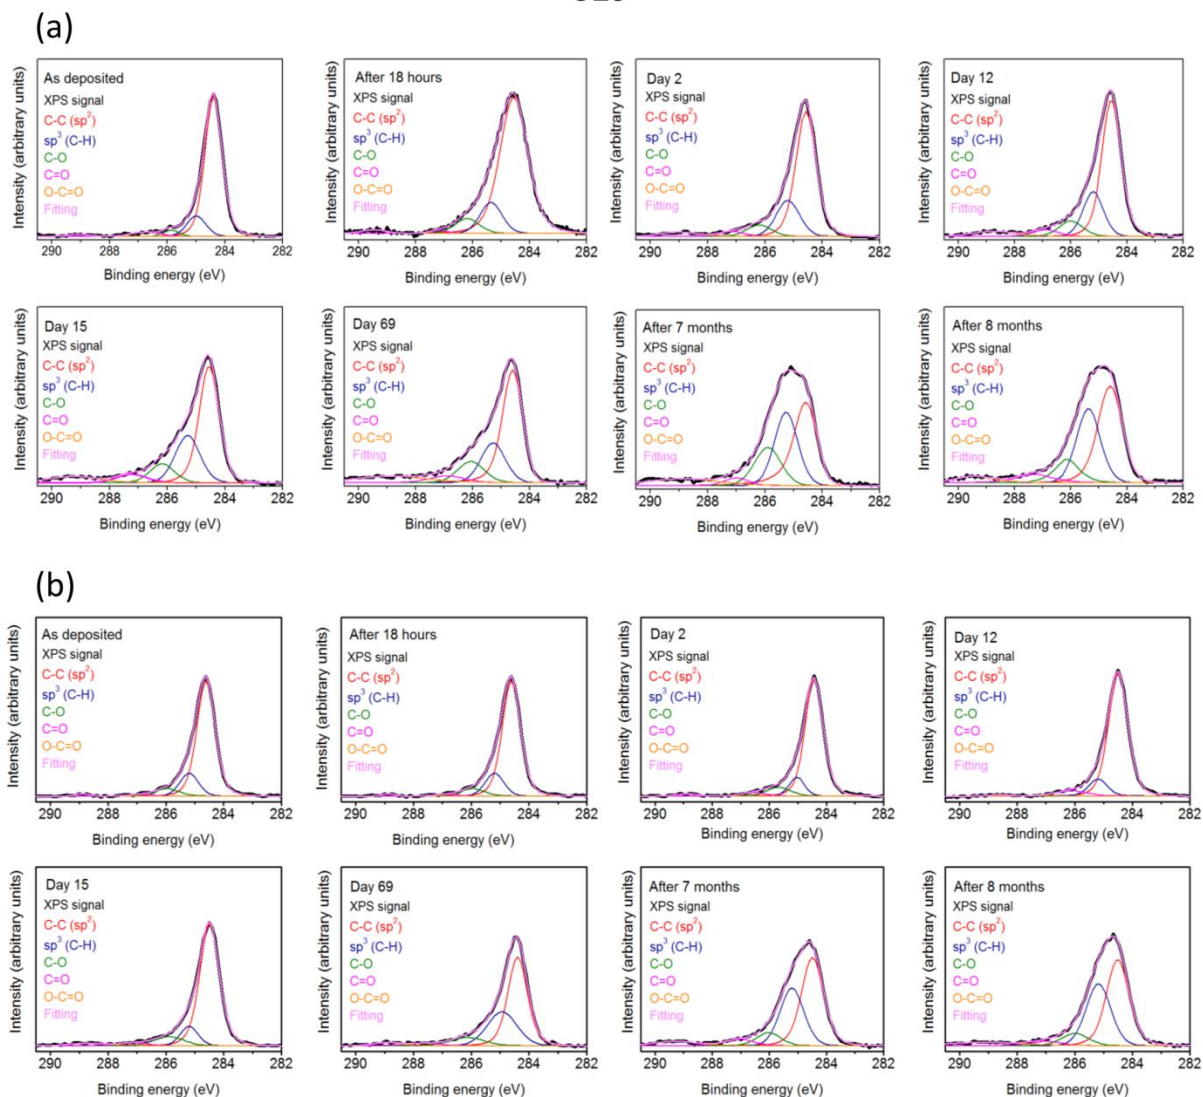

Figure S1. C1s spectra of (a) graphene covered Ge(001) and (b) graphene covered Ge(110) samples as a function of time.

# O1s

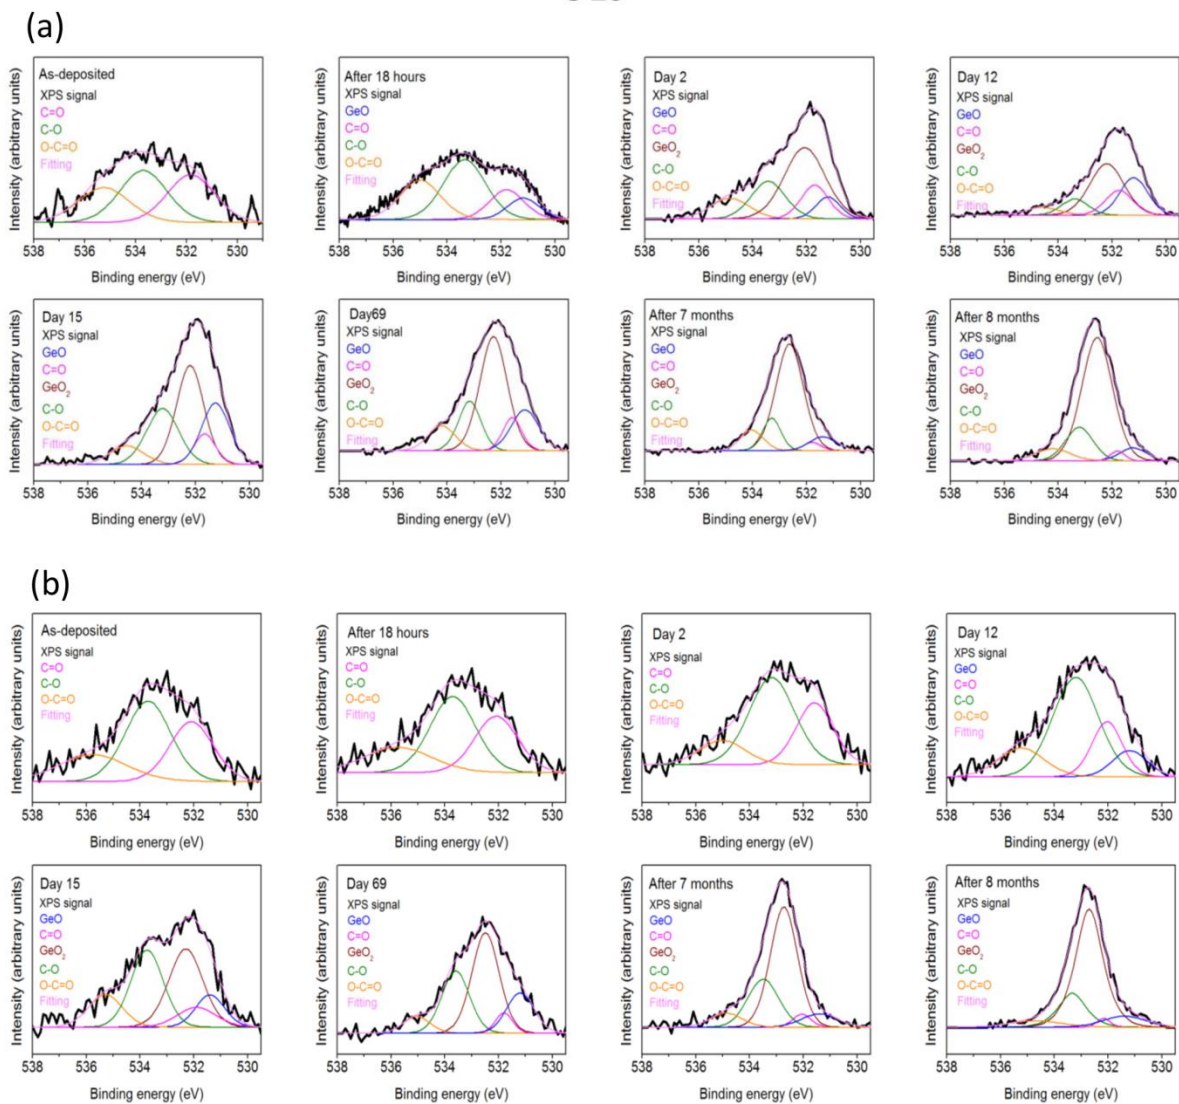

Figure S2. O1s spectra of (a) graphene/Ge(001) and (b) graphene/Ge(110) samples as a function of time.

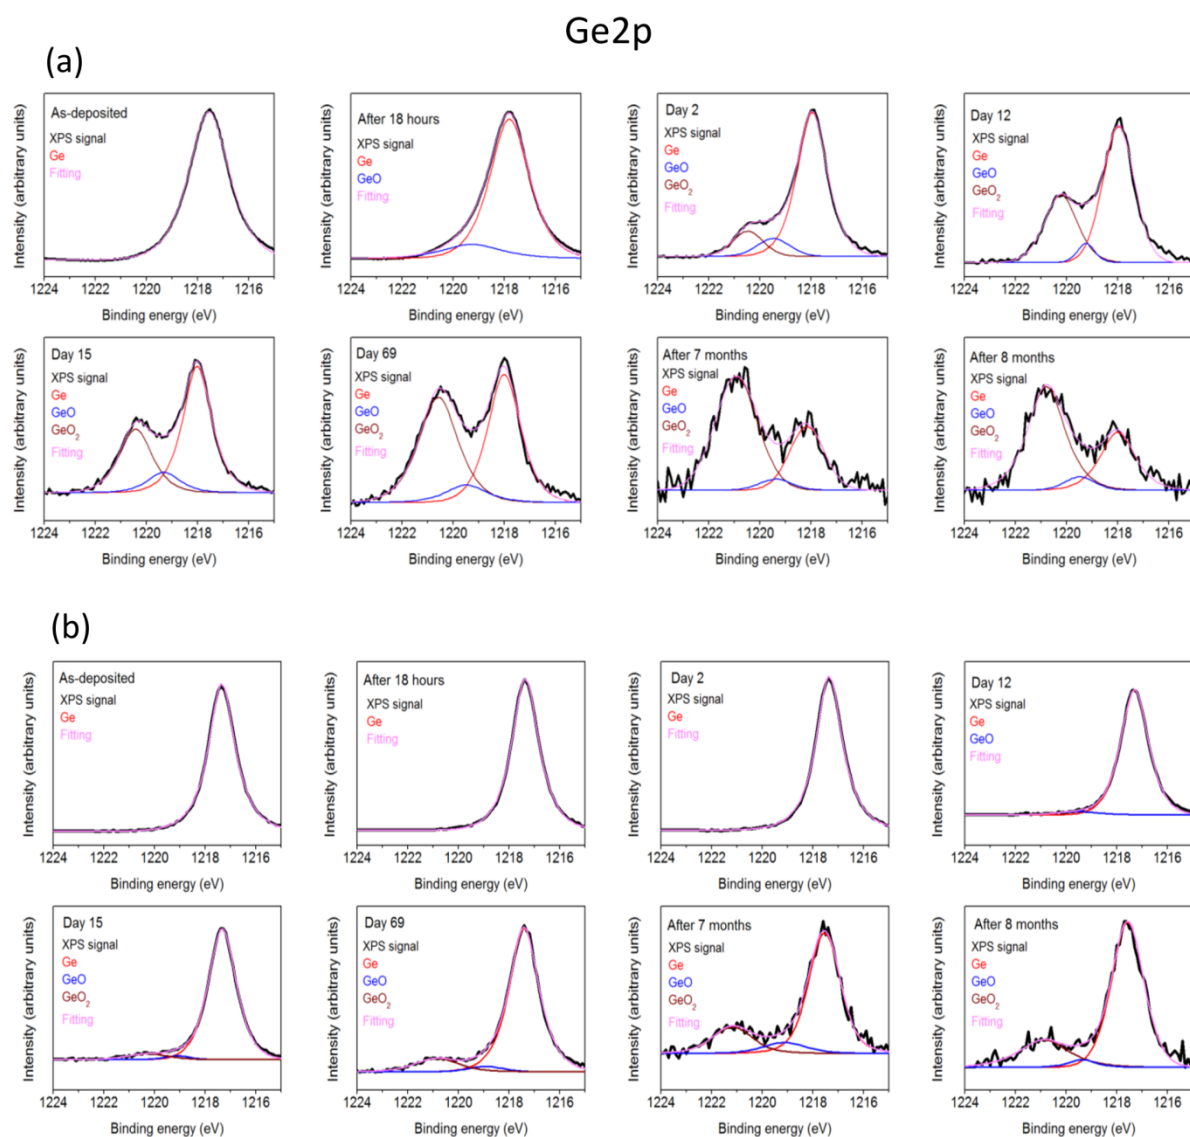

Figure S3. Ge2p spectra of (a) graphene/Ge(001) and (b) graphene/Ge(110) samples as a function of time.
